# Supplementary material
Source: PubMed Central journal article supplement (PMC3944341)

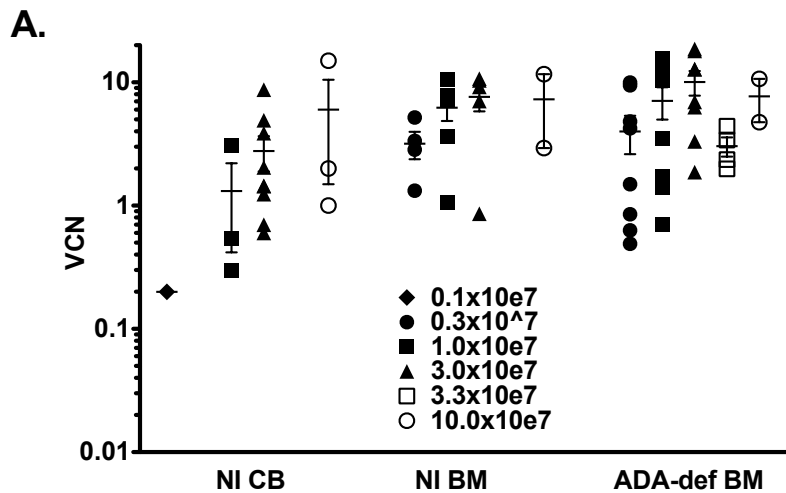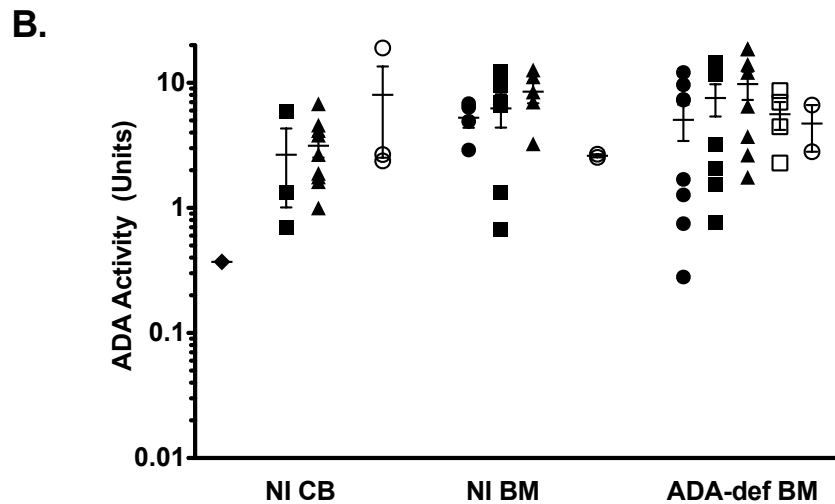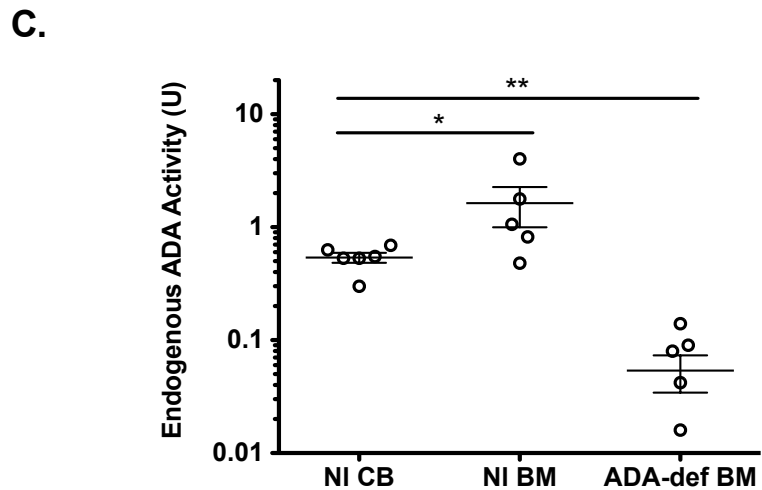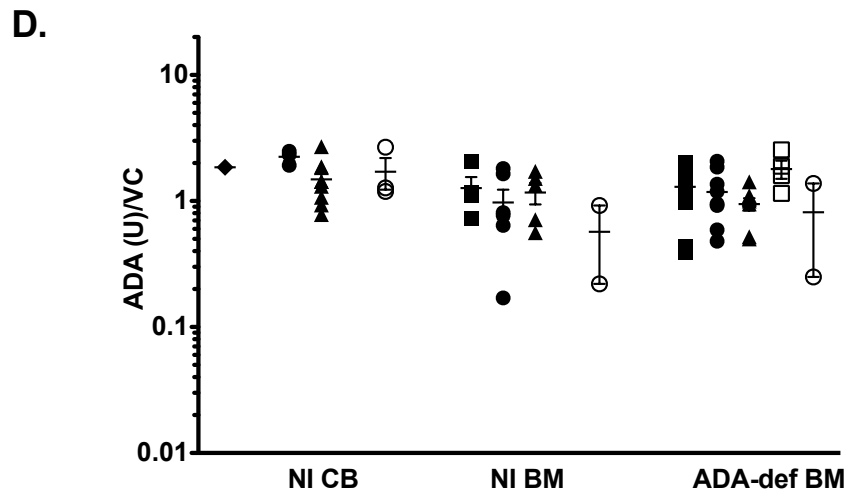

Supplement: mt2013265x1.pdf [file mt2013265x1.pdf]

IVIM-WST1

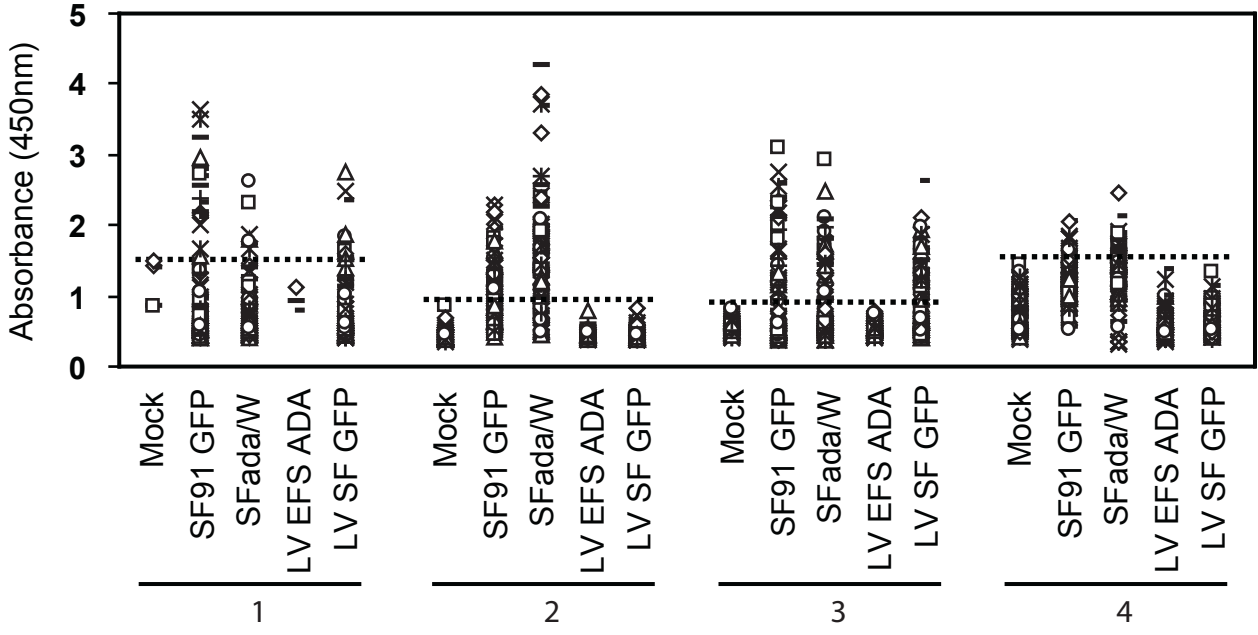

Supplement: mt2013265x2.pdf [file mt2013265x2.pdf]
